# Supplementary material
Source: Springer Nature journal article supplement (https://www.springermedizin.de/resource/supplementary/12936_2014_3166_MOESM7_ESM.pdf/9545264)

**A**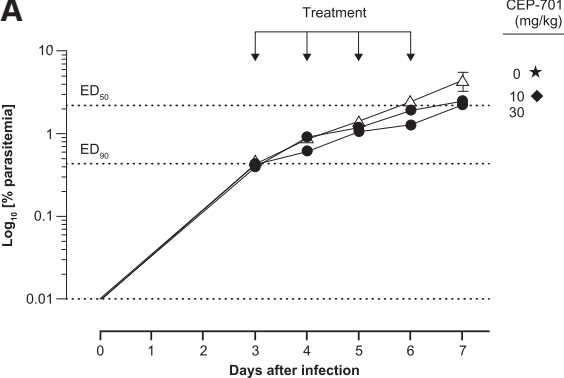**B**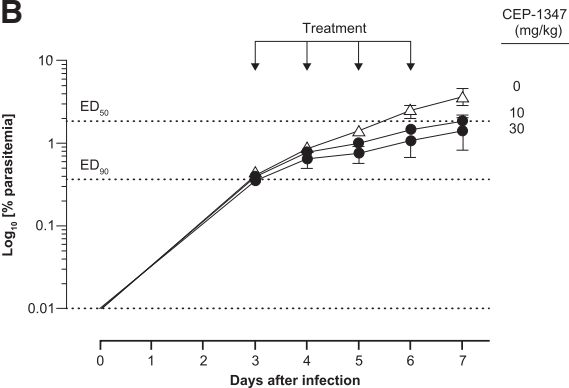

Supplement: MOESM7 [file 9545264]
